# Supplementary material for: Convergent evolution of an extreme dietary specialisation, the olfactory system of worm-eating rodents
Source: PubMed Central journal article supplement (PMC6293001; doi:10.1038/s41598-018-35827-0), 2018-12-13
Supplement: 41598_2018_35827_MOESM1_ESM.pdf [file 41598_2018_35827_MOESM1_ESM.pdf]

Electronic supplementary material (ESM) for:

## **Convergent evolution of an extreme dietary specialisation, the olfactory system of worm-eating rodents**

Quentin Martinez<sup>1\*</sup>, Renaud Lebrun<sup>1</sup>, Anang S. Achmadi<sup>2</sup>, Jacob A. Esselstyn<sup>3,4</sup>, Alistair R. Evans<sup>5,6</sup>, Lawrence R. Heaney<sup>7</sup>, Roberto Portela Miguez<sup>8</sup>, Kevin C. Rowe<sup>6,9</sup>, and Pierre-Henri Fabre<sup>1</sup>

<sup>1</sup> Institut des Sciences de l'Evolution (ISEM, UMR 5554 CNRS-IRD-UM), Université de Montpellier, Place E. Bataillon - CC 064 - 34095 Montpellier Cedex 5, France

<sup>2</sup> Museum Zoologicum Bogoriense, Research Center For Biology, Indonesian Institute of Sciences (LIPI), Jl.Raya Jakarta-Bogor Km.46 Cibinong 16911, Indonesia

<sup>3</sup> Museum of Natural Science, 119 Foster Hall, Louisiana State University, Baton Rouge, Louisiana 70803, United States

<sup>4</sup> Department of Biological Sciences, Louisiana State University, Baton Rouge, Louisiana 70803, United States

<sup>5</sup> School of Biological Sciences, 18 Innovation Walk, Monash University, Victoria 3800, Australia

<sup>6</sup> Sciences Department, Museums Victoria, Melbourne, Victoria, 3001, Australia

<sup>7</sup> Field Museum of Natural History, 1400 S Lake Shore Drive, Chicago, 60605, United States

<sup>8</sup> Natural History Museum, London, Department of Life Sciences, Mammal Section, United Kingdom, London

<sup>9</sup> School of BioSciences, The University of Melbourne, Melbourne, Victoria, 3010, Australia

\*Corresponding author (quentinmartinezphoto@gmail.com).

**Figure S1.** Coronal cross section and sagittal plane of skull and 3D representations of turbinal bones in *Rattus norvegicus*, *Rhynchomys soricoides*, and *Paucidentomys vermidax*. Abbreviations: see Table S1.

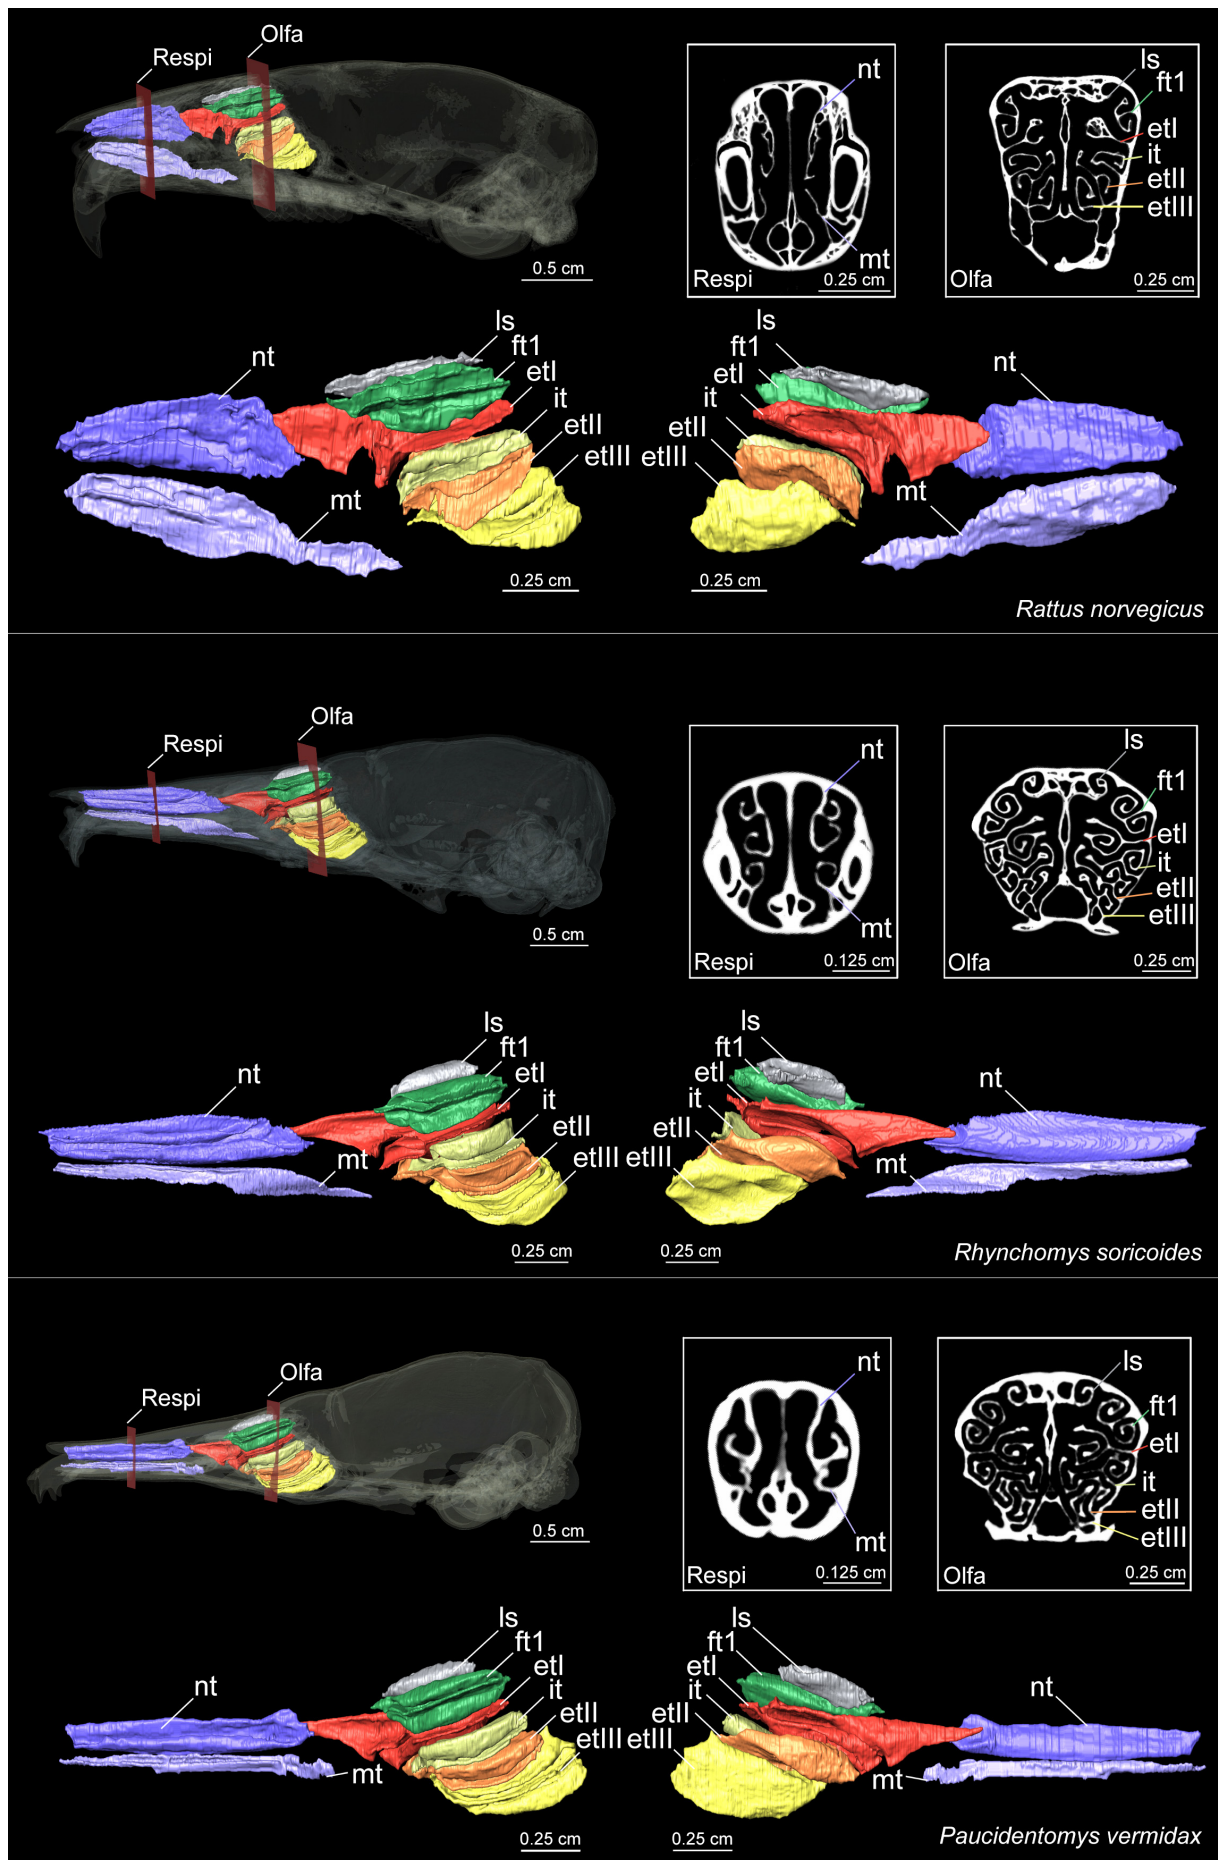

**Figure S2.** Coronal cross section and sagittal plane of skull and 3D representations of turbinal bones in *Sommeromys macrorhinos*, *Deomys ferrugineus*, and *Mus cervicolor*. Abbreviations: see Table S1.

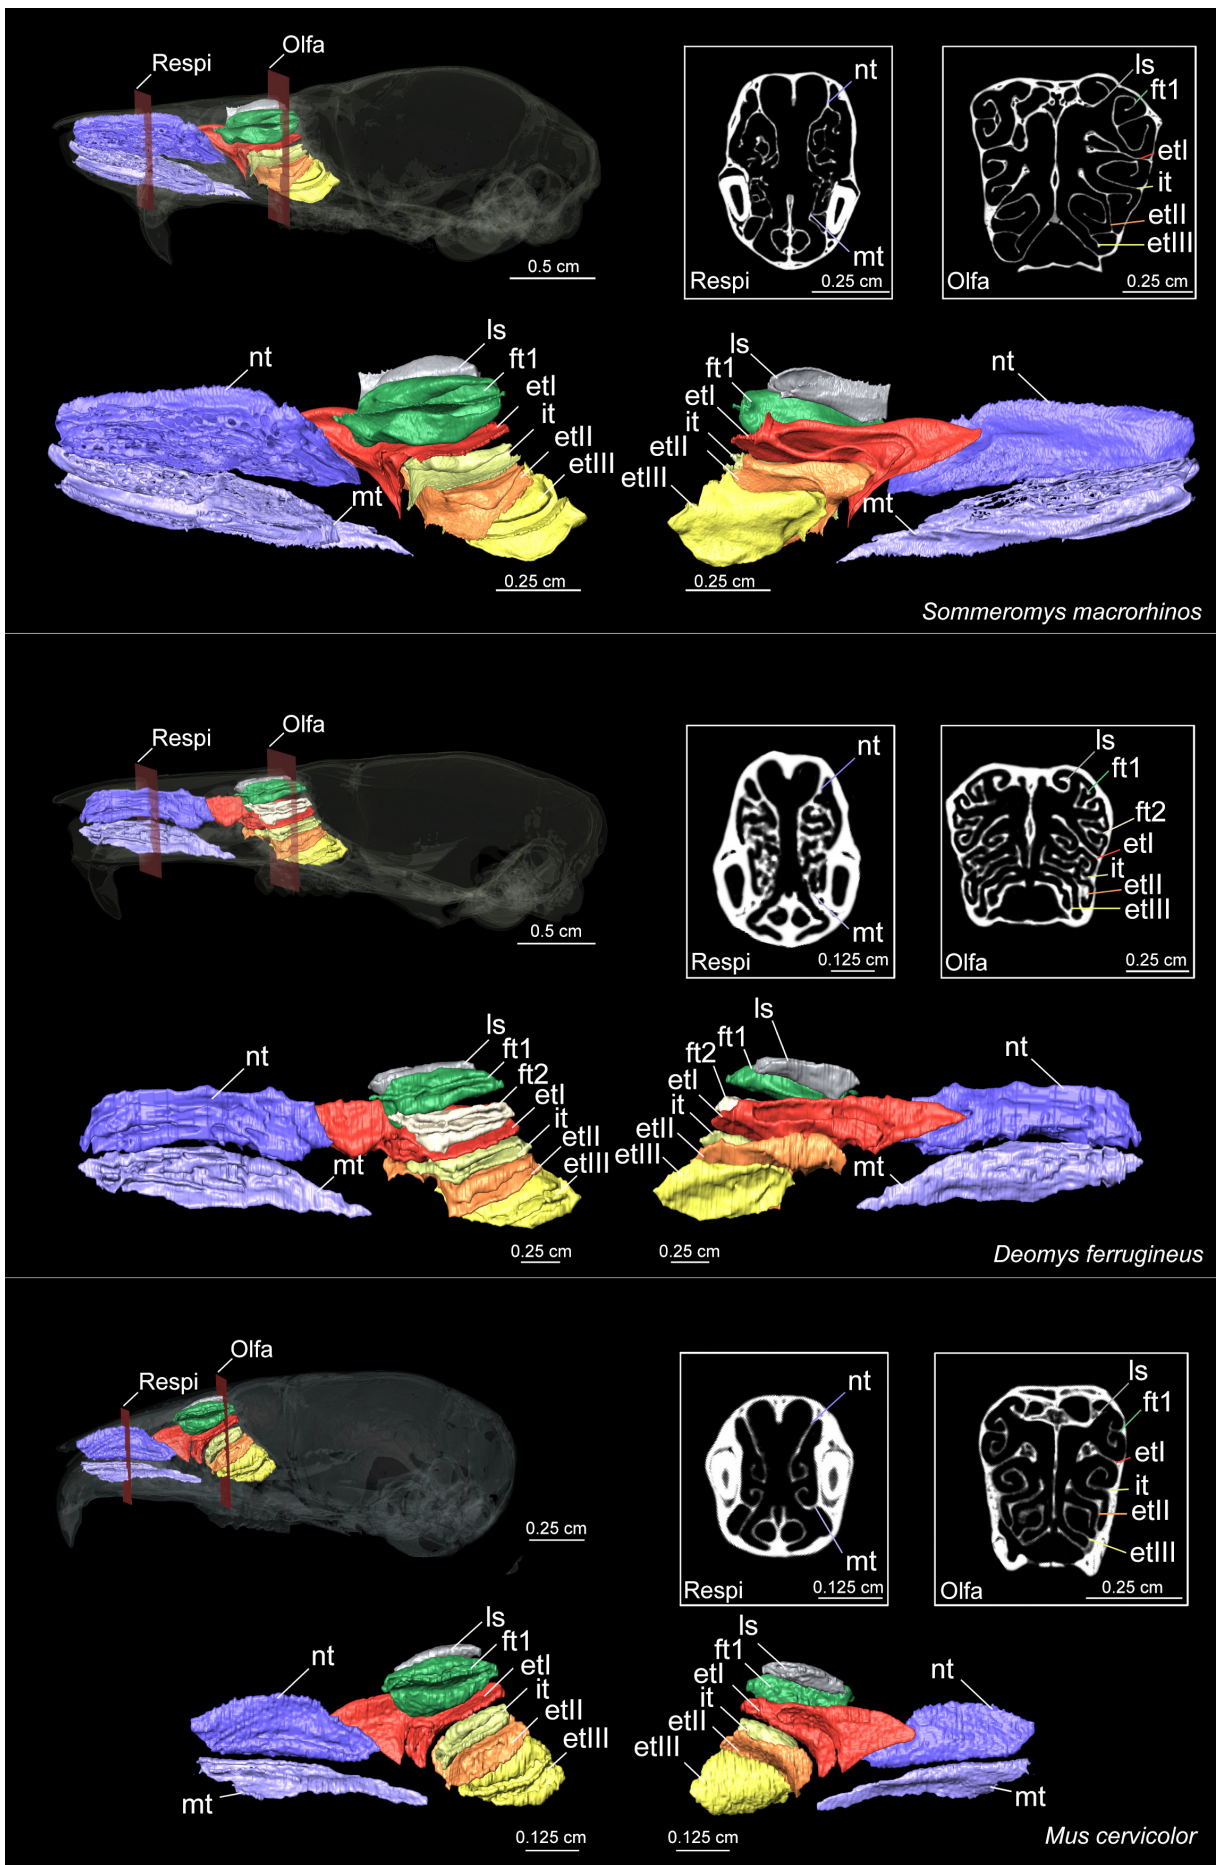

**Figure S3.** Linear regressions (continuous line) and PGLS (dashed line) of (A) total surface area of turbinals against skull length, (B) respiratory turbinals surface area against skull length, (C) olfactory turbinals surface area against skull length, (D) 3D respiratory complexity (CHAR) against skull length, and (E) 3D olfactory complexity (CHAR) against skull.

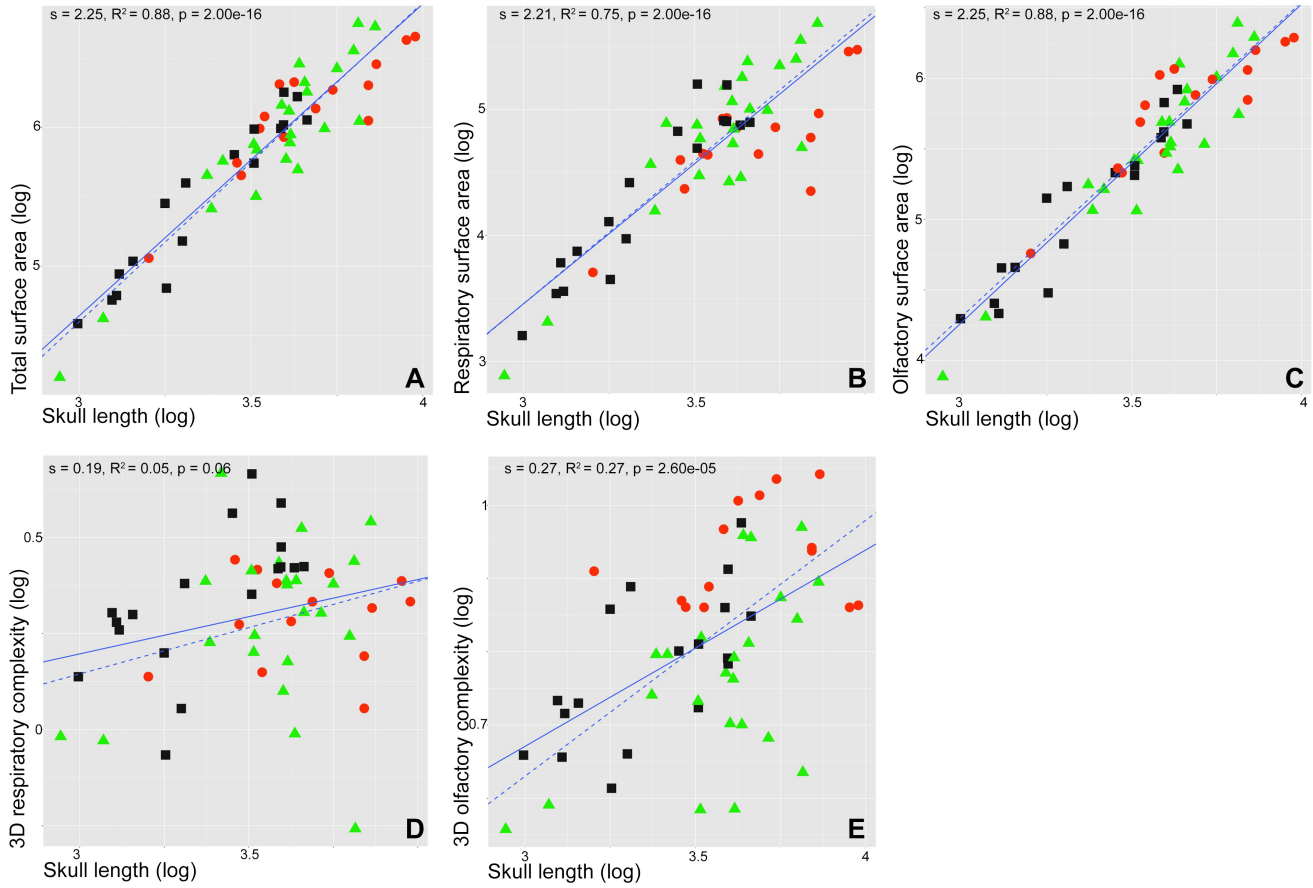

**Figure S4.** Boxplot with dietary categories: (A) relative nasoturbinale surface area and (B) relative maxilloturbinale surface area. Boxplots are based on PGLS residuals. Significance codes are based on phylogenetic Tukey's HSD test. (i) *Rhynchomys soricoides*, (ii) *Sommeromys macrorhinos*, and (iii) *Rattus norvegicus*. Red points are outliers.

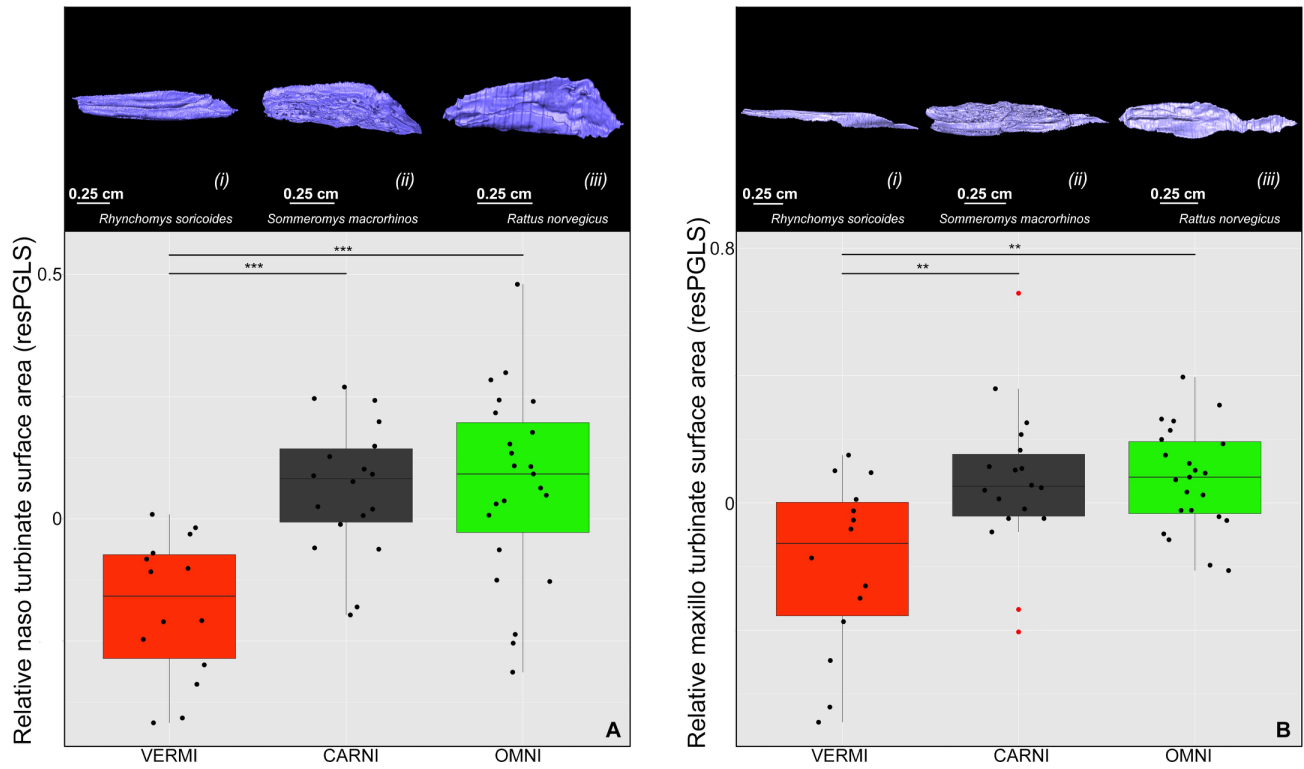

**Figure S5.** Boxplot of the residuals of PGLS (resPGLS) between olfactory and respiratory complexity with dietary categories: (A) 2D complexity method, (B) 3D complexity method (CHAR), and 3D complexity method (CHNSI).

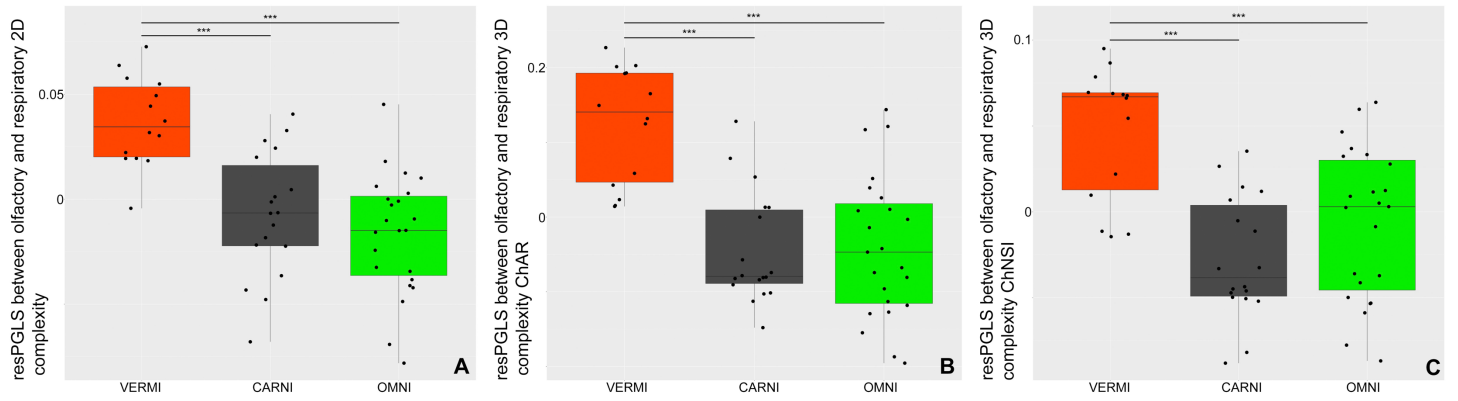



**Figure S6.** Boxplot of snout width (SNW) with dietary categories. Boxplot are based on PGLS residuals. Significance code are based on phylogenetic Tukey's HSD test. (i) *Rhynchomys isarogenesis*, (ii) *Leptomys elegans*, (iii) *Malacomys cansdalei*, and (iiii) *Chrotomys silaceus*.

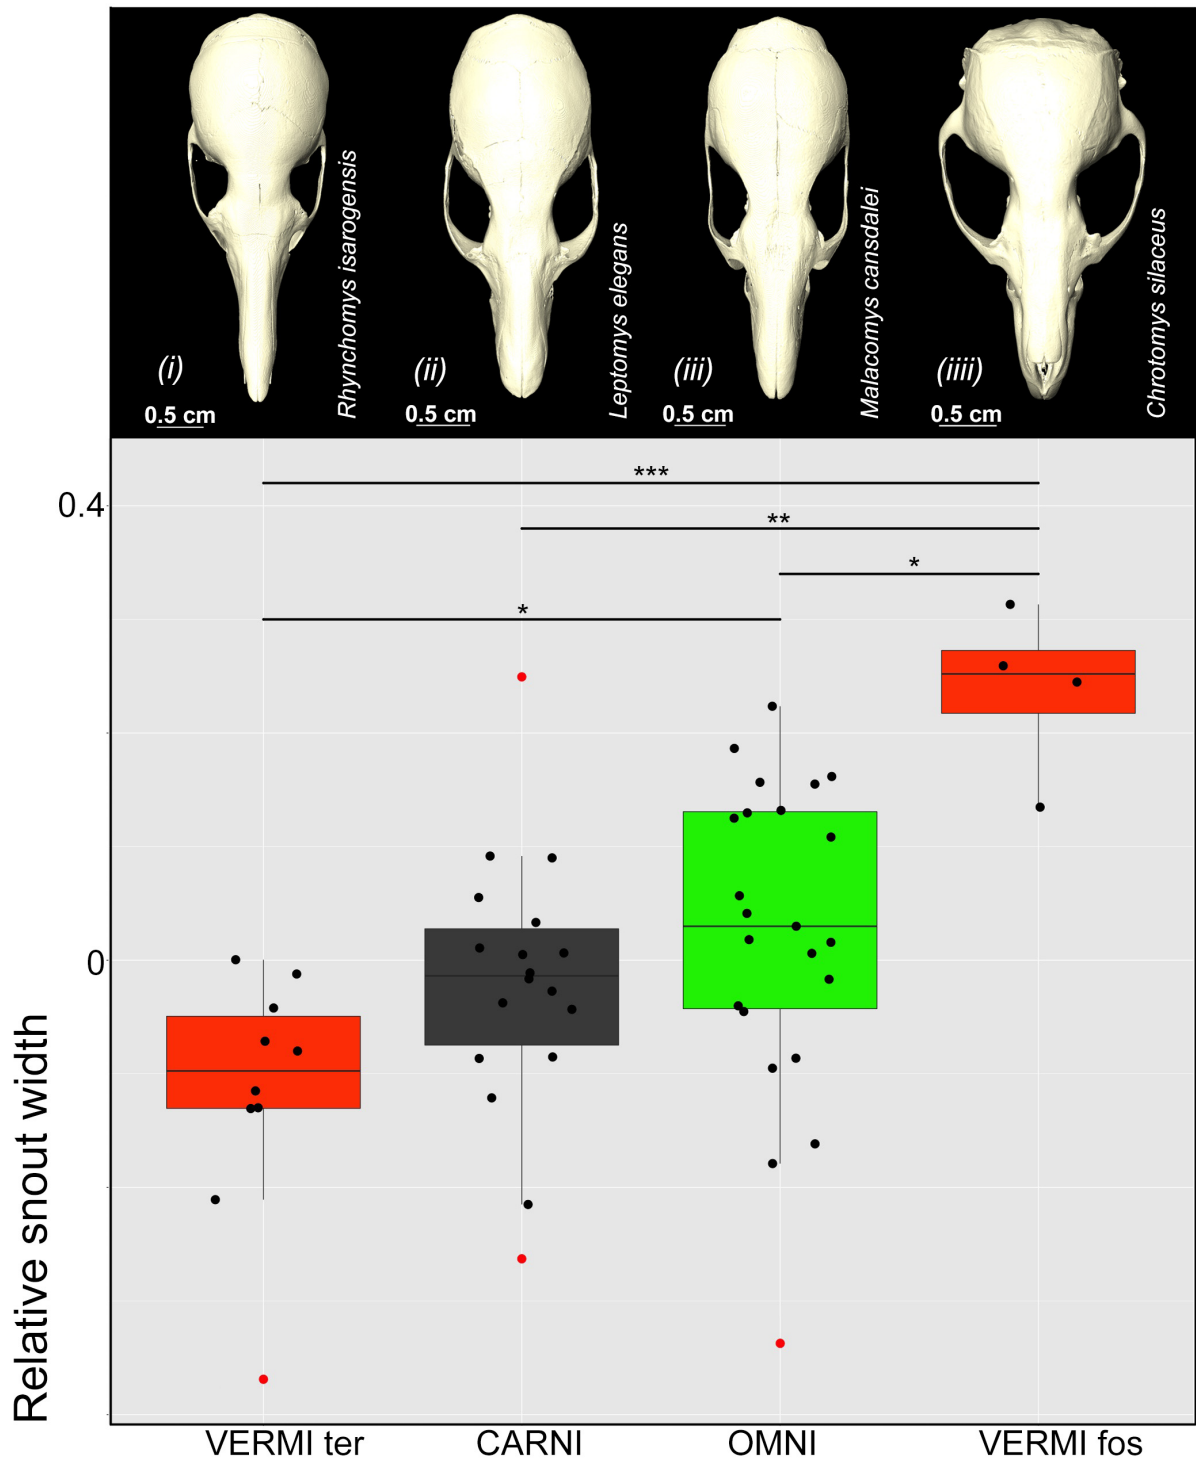

**Legend S1.** In order to implement phylogenetic comparative analyses to our turbinal dataset, we build a composite phylogenetic tree. Concerning the murinae we used the phylogenetic tree from Rowe et al. (2016). We subsequently used the dated tree from Steppan & Schenk (2017) for the divergence among Cricetidae and the basal split between Muridae and Cricetidae. A species of *Crunomys*, a *Malacomys*, 2 species of *Pseudohydromys*, 3 species of *Leptomys* were missing from these phylogenies. We constrained missing species to their assigned genus, thereby assuming monophyly at the genus level, respectively. We subsequently used the PASTIS R package (Thomas *et al.* 2013) to randomly incorporate them in our composite tree following Maestri *et al.* (2016) protocol.



**Table S1.** PGLS and linear regression results. Abbreviations: SA = surface area, TotSA = total surface area of turbinals, Relat = relative, Cor = corrected, NoCor = non-corrected, CHAR = convex hull area ratio, CHNSI = convex hull normalized shape index, Respi = respiratory, Olfa = olfactory, NT = nasoturbinal, MT = maxilloturbinal, LS = lamina semicircularis, FT1 = frontoturbinal 1, FT1 bis = frontoturbinal 1 bis, FT2 = frontoturbinal 2, ET1 = ethmoturbinal 1, ET2 = ethmoturbinal 2, and ET3 = ethmoturbinal 3, SKL = skull length, SNW = snout width, SNL = snout length, NaRe = nasoturbinal considered as respiratory turbinal, and NaOl = nasoturbinal considered as olfactory turbinal.

| Variables                | Slope | P-value  | Signif-code | R-squared | PGLS slope | PGLS p-value |
|--------------------------|-------|----------|-------------|-----------|------------|--------------|
| TotSA/SKL                | 2.25  | 2.00e-16 | ***         | 0.88      | 2.30       | <0.01        |
| RespiSA/SKL              | 2.21  | 2.00e-16 | ***         | 0.75      | 2.26       | <0.01        |
| OlfaSA/SKL               | 2.25  | 2.00e-16 | ***         | 0.88      | 2.33       | <0.01        |
| OlfaSA/RespiSA           | 0.86  | 2.00e-16 | ***         | 0.83      | 0.74       | <0.01        |
| OlfaSA/TotSA             | 0.99  | 2.00e-16 | ***         | 0.98      | 1.00       | <0.01        |
| RespiSA/TotSA            | 1.02  | 2.00e-16 | ***         | 0.92      | 0.99       | <0.01        |
| 2DNoCorOlfa/2DNoCorRespi | 0.37  | 2.00e-16 | ***         | 0.19      | 0.33       | 2.00E-04     |
| 2DCorOlfa/SKL            | 0.34  | 1.52e-03 | **          | 0.16      | 0.25       | 0.08         |
| 2DCorRespi/SKL           | 0.28  | 0.03     | *           | 0.07      | 0.21       | 0.38         |
| 2DCorOlfa/RelatOlfaSA    | 0.41  | 0.22     | -           | 0.01      | 0.34       | 0.16         |
| 2DCorRespi/RelatRespiSA  | 0.48  | 0.01     | **          | 0.12      | 0.55       | 4.00e-03     |
| OlfaCHAR/RespiCHAR       | 0.29  | 7.33e-04 | ***         | 0.18      | 0.19       | 2.80e-03     |
| OlfaCHAR/SKL             | 0.27  | 2.60e-05 | ***         | 0.27      | 0.35       | 1.00e-04     |
| RespiCHAR/SKL            | 0.19  | 0.06     | -           | 0.05      | 0.24       | 0.18         |
| OlfaCHAR/OlfaSA          | 0.15  | 8.21e-10 | ***         | 0.50      | 0.18       | <0.01        |
| OlfaCHAR/RelatOlfaSA     | 0.47  | 0.02     | *           | 0.08      | 0.14       | 0.36         |
| RespiCHAR/RespiSA        | 0.18  | 5.33e-07 | ***         | 0.36      | 0.31       | <0.01        |
| RespiCHAR/RelatRespiSA   | 0.55  | 4.81e-06 | ***         | 0.31      | 0.81       | <0.01        |
| OlfaCHNSI/RespiCHNSI     | 0.40  | 6.99e-06 | ***         | 0.30      | 0.19       | 0.01         |
| OlfaCHNSI/SKL            | 0.17  | 3.13e-09 | ***         | 0.47      | 0.19       | <0.01        |
| RespiCHNSI/SKL           | 0.15  | 7.42e-04 | ***         | 0.18      | 0.16       | 0.06         |
| OlfaCHNSI/OlfaSA         | 0.08  | 5.91e-16 | ***         | 5.90e-16  | 0.10       | <0.01        |
| OlfaCHNSI/RelatOlfaSA    | 0.18  | 0.06     | -           | 0.05      | 0.10       | 0.15         |
| RespiCHNSI/RespiSA       | 0.09  | 2.55e-09 | ***         | 0.48      | 0.14       | <0.01        |
| RespiCHNSI/RelatRespiSA  | 0.19  | 4.78e-04 | ***         | 0.19      | 0.35       | <0.01        |

**Table S2.** Analysis of variance (ANOVA) results for dietary variables. Abbreviations: see Table S1.

| <b>Variable</b>            | <b>Sum Sq</b> | <b>Mean Sq</b> | <b>F value</b> | <b>Pr(&gt;F)</b> | <b>Signif-code</b> |
|----------------------------|---------------|----------------|----------------|------------------|--------------------|
| OlfSA/TotSA                | 0.11          | 0.06           | 13.04          | 2.57e-05         | ***                |
| RespiSA/TotSA              | 0.67          | 0.34           | 15.90          | 4.11e-06         | ***                |
| OlfSA/RespiSA              | 1.42          | 0.71           | 20.57          | 2.62e-07         | ***                |
| MT/TotSA                   | 0.73          | 0.37           | 7.61           | 1.25e-03         | **                 |
| NT/TotSA                   | 0.63          | 0.31           | 11.66          | 6.57e-05         | ***                |
| 2DCorOlfSA/SKL             | 0.66          | 0.33           | 15.54          | 5.11e-06         | ***                |
| 2DCorRespi/SKL             | 0.18          | 0.09           | 1.86           | 0.17             | -                  |
| 2DNoCorOlfSA/2DNoDCorRespi | 0.03          | 0.01           | 17.50          | 1.54e-06         | ***                |
| SNL/SKL                    | 0.01          | 0.01           | 1.31           | 0.28             | -                  |
| SNL/SKL_VERMI_fos_ter      | 0.04          | 0.01           | 3.83           | 0.01             | *                  |
| SNW/SNL                    | 0.02          | 0.01           | 0.57           | 0.57             | -                  |
| SNW/SNL_VERMI_fos_ter      | 0.38          | 0.13           | 8.52           | 1.09e-04         | ***                |
| OlfCHAR/RespiCHAR          | 0.29          | 0.15           | 20.01          | 3.59e-07         | ***                |
| OlfCHAR/SKL                | 0.18          | 0.09           | 11.28          | 8.54e-05         | ***                |
| RespiCHAR/SKL              | 0.12          | 0.06           | 2.04           | 0.14             | -                  |
| OlfCHNSI/RespiCHNSI        | 0.04          | 0.02           | 13.66          | 1.71e-05         | ***                |
| OlfCHNSI/SKL               | 0.02          | 0.01           | 6.13           | 4.08e-03         | **                 |
| RespiCHNSI/SKL             | 0.01          | 0.01           | 1.32           | 0.27             | -                  |

**Table S3.** Phylogenetic Tukey's HSD results. Abbreviations: see Table S1.

| Variables      | Comparison        | p-value  | Signif-code |
|----------------|-------------------|----------|-------------|
| RespiSA/TotSA  | OMNI/CARNI        | 0.99     | -           |
| RespiSA/TotSA  | VERMI/CARNI       | 1.18e-05 | ***         |
| RespiSA/TotSA  | VERMI/OMNI        | 1.00e-05 | ***         |
| OlfaSA/TotSA   | OMNI/CARNI        | 0.97     | -           |
| OlfaSA/TotSA   | VERMI/CARNI       | 9.17e-05 | ***         |
| OlfaSA/TotSA   | VERMI/OMNI        | 8.40e-05 | ***         |
| OlfaSA/RespiSA | OMNI/CARNI        | 0.64     | -           |
| OlfaSA/RespiSA | VERMI/CARNI       | 1.00e-04 | ***         |
| OlfaSA/RespiSA | VERMI/OMNI        | 1.00e-04 | ***         |
| MTSA/TotSA     | OMNI/CARNI        | 0.98     | -           |
| MTSA/TotSA     | VERMI/CARNI       | 4.47e-03 | **          |
| MTSA/TotSA     | VERMI/OMNI        | 1.34e-03 | **          |
| NTSA/TotSA     | OMNI/CARNI        | 0.98     | -           |
| NTSA/TotSA     | VERMI/CARNI       | 2.67e-04 | ***         |
| NTSA/TotSA     | VERMI/OMNI        | 2.19e-04 | ***         |
| SNL/SKL        | OMNI/CARNI        | 0.32     | -           |
| SNL/SKL        | VERMIter/CARNI    | 0.94     | -           |
| SNL/SKL        | VERMIfos/CARNI    | 0.04     | *           |
| SNL/SKL        | VERMIter/OMNI     | 0.19     | -           |
| SNL/SKL        | VERMIfos/OMNI     | 0.30     | -           |
| SNL/SKL        | VERMIter/VERMIfos | 0.03     | *           |
| SNW/SNL        | OMNI/CARNI        | 0.65     | -           |
| SNW/SNL        | VERMIter/CARNI    | 0.21     | -           |
| SNW/SNL        | VERMIfos/CARNI    | 2.00e-03 | **          |

| Variables                | Comparison        | p-value  | Signif-code |
|--------------------------|-------------------|----------|-------------|
| SNW/SNL                  | VERMIter/OMNI     | 0.02     | *           |
| SNW/SNL                  | VERMIfos/OMNI     | 0.01     | *           |
| SNW/SNL                  | VERMIter/VERMIfos | 6.03e-05 | ***         |
| 2DCorOlfa/SKL            | OMNI/CARNI        | 2.67e-04 | ***         |
| 2DCorOlfa/SKL            | VERMI/CARNI       | 0.31     | -           |
| 2DCorOlfa/SKL            | VERMI/OMNI        | 1.00e-04 | ***         |
| 2DCorRespi/SKL           | OMNI/CARNI        | 0.07     | -           |
| 2DCorRespi/SKL           | VERMI/CARNI       | 0.29     | -           |
| 2DCorRespi/SKL           | VERMI/OMNI        | 0.88     | -           |
| 2DNoCorOlfa/2NoDCorRespi | OMNI/CARNI        | 0.52     | -           |
| 2DNoCorOlfa/2NoDCorRespi | VERMI/CARNI       | 1.00e-04 | ***         |
| 2DNoCorOlfa/2NoDCorRespi | VERMI/OMNI        | 1.00e-04 | ***         |
| OlfaCHAR/RespiCHAR       | OMNI/CARNI        | 0.99     | -           |
| OlfaCHAR/RespiCHAR       | VERMI/CARNI       | 2.70e-06 | ***         |
| OlfaCHAR/RespiCHAR       | VERMI/OMNI        | 1.60e-06 | ***         |
| OlfaCHAR/SKL             | OMNI/CARNI        | 0.05     | *           |
| OlfaCHAR/SKL             | VERMI/CARNI       | 0.06     | -           |
| OlfaCHAR/SKL             | VERMI/OMNI        | 5.42e-05 | ***         |
| OlfaCHNSI/RespiCHNSI     | OMNI/CARNI        | 0.25     | -           |
| OlfaCHNSI/RespiCHNSI     | VERMI/CARNI       | 1.36e-05 | ***         |
| OlfaCHNSI/RespiCHNSI     | VERMI/OMNI        | 8.26e-04 | ***         |
| OlfaCHNSI/SKL            | OMNI/CARNI        | 0.39     | -           |
| OlfaCHNSI/SKL            | VERMI/CARNI       | 0.09     | -           |
| OlfaCHNSI/SKL            | VERMI/OMNI        | 2.73e-03 | **          |

**Table S4.** Phylogenetic Tukey's HSD differences between considering the nasoturbinal whether as olfactory whether as respiratory turbinals. Abbreviations: see Table S1.

| <b>Variables</b> | <b>Comparison</b> | <b>NaRe p-value</b> | <b>NaOI p-value</b> |
|------------------|-------------------|---------------------|---------------------|
| RespiSA/TotSA    | OMNI/CARNI        | 0.76                | 0.83                |
| RespiSA/TotSA    | VERMI/CARNI       | 0.01                | 0.03                |
| RespiSA/TotSA    | VERMI/OMNI        | 0.00                | 0.00                |
| OlfSA/TotSA      | OMNI/CARNI        | 0.90                | 1.00                |
| OlfSA/TotSA      | VERMI/CARNI       | 0.01                | 0.03                |
| OlfSA/TotSA      | VERMI/OMNI        | 0.00                | 0.04                |
| OlfSA/RespiSA    | OMNI/CARNI        | 0.86                | 0.75                |
| OlfSA/RespiSA    | VERMI/CARNI       | 0.00                | 0.00                |
| OlfSA/RespiSA    | VERMI/OMNI        | 0.00                | 0.00                |

**Table S5.** Comparison between the results of phylogenetic Tukey's HSD and non-phylogenetic Tukey's HSD. Abbreviations: see Table S1.

| <b>Variables</b> | <b>Comparison</b> | <b>PhyloTukey p-value</b> | <b>Tukey p-value</b> |
|------------------|-------------------|---------------------------|----------------------|
| RespiSA/TotSA    | OMNI/CARNI        | 0.76                      | 0.94                 |
| RespiSA/TotSA    | VERMI/CARNI       | 0.01                      | 0.00                 |
| RespiSA/TotSA    | VERMI/OMNI        | 0.00                      | 0.00                 |
| OlfSA/TotSA      | OMNI/CARNI        | 0.90                      | 0.98                 |
| OlfSA/TotSA      | VERMI/CARNI       | 0.01                      | 0.00                 |
| OlfSA/TotSA      | VERMI/OMNI        | 0.00                      | 0.00                 |
| OlfSA/RespiSA    | OMNI/CARNI        | 0.86                      | 0.44                 |
| OlfSA/RespiSA    | VERMI/CARNI       | 0.00                      | 0.00                 |
| OlfSA/RespiSA    | VERMI/OMNI        | 0.00                      | 0.00                 |

**Table S6.** Results of phylogenetic ANCOVA. Three models were contrasted: a model without dietary categories (H0), a model with omnivorous and carnivorous dietary categories (Carni), and a model with omnivorous, carnivorous, and vermivorous dietary categories (Vermi). Model were compared using the Akaike information criterion (AIC) and the Likelihood-ratio test.

|       | <b>AIC</b>    | <b>Lr test likelihood</b> | <b>Lr test p-value</b> |          |          |
|-------|---------------|---------------------------|------------------------|----------|----------|
|       |               |                           | H0                     | Carni    | Vermi    |
|       | RespiSA/TotSA |                           |                        |          |          |
| H0    | 512.34        | -253.17                   | -                      | 2.12e-04 | 6.02e-09 |
| Carni | 499.42        | -244.71                   | -                      | -        | 8.46e-07 |
| Vermi | 477.17        | -232.58                   | -                      | -        | -        |

|       | <b>AIC</b>   | <b>Lr test likelihood</b> | <b>Lr test p-value</b> |          |          |
|-------|--------------|---------------------------|------------------------|----------|----------|
|       |              |                           | H0                     | Carni    | Vermi    |
|       | OlfaSA/TotSA |                           |                        |          |          |
| H0    | 512.34       | -253.17                   | -                      | 2.12e-04 | 6.02e-09 |
| Carni | 499.42       | -244.71                   | -                      | -        | 8.46e-07 |
| Vermi | 477.17       | -232.58                   | -                      | -        | -        |

|       | <b>AIC</b>     | <b>Lr test likelihood</b> | <b>Lr test p-value</b> |          |          |
|-------|----------------|---------------------------|------------------------|----------|----------|
|       |                |                           | H0                     | Carni    | Vermi    |
|       | OlfaSA/RespiSA |                           |                        |          |          |
| H0    | 636.07         | -315.03                   | -                      | 3.20e-06 | 2.06e-12 |
| Carni | 614.76         | -302.38                   | -                      | -        | 1.43e-08 |
| Vermi | 584.62         | -286.31                   | -                      | -        | -        |

|       | <b>AIC</b> | <b>Lr test likelihood</b> | <b>Lr test p-value</b> |          |          |
|-------|------------|---------------------------|------------------------|----------|----------|
|       |            |                           | H0                     | Carni    | Vermi    |
|       | RespiSKL   |                           |                        |          |          |
| H0    | 565.52     | -279.76                   | -                      | 1.55e-05 | 5.06e-09 |
| Carni | 591.67     | -290.84                   | -                      | -        | 1.47e-15 |
| Vermi | 530.00     | -259.00                   | -                      | -        | -        |

|       | <b>AIC</b> | <b>Lr test likelihood</b> | <b>Lr test p-value</b> |          |          |
|-------|------------|---------------------------|------------------------|----------|----------|
|       |            |                           | H0                     | Carni    | Vermi    |
|       | OlfaSKL    |                           |                        |          |          |
| H0    | 636.07     | -315.03                   | -                      | 3.10e-11 | 2.48e-12 |
| Carni | 591.67     | -290.84                   | -                      | -        | 3.22e-03 |
| Vermi | 585.00     | -286.50                   | -                      | -        | -        |

|       | <b>AIC</b>         | <b>Lr test likelihood</b> | <b>Lr test p-value</b> |          |          |
|-------|--------------------|---------------------------|------------------------|----------|----------|
|       |                    |                           | H0                     | Carni    | Vermi    |
|       | OlfaCHAR/RespiCHAR |                           |                        |          |          |
| H0    | 59.32              | -26.66                    | -                      | 9.84e-13 | 4.98e-14 |
| Carni | 8.03               | 0.99                      | -                      | -        | 1.82e-03 |
| Vermi | 0.31               | 5.85                      | -                      | -        | -        |

**Table S7.** Results of 1.000 simulations of single-rate BM and three alternative OU models with the ratio between snout width (SNW) and snout length (SNL). BM and OU1 with omnivorous and all carnivorous dietary categories (carnivorous + vermivorous); OU2 with omnivorous, carnivorous, and vermivorous dietary categories; and OU3 with omnivorous, carnivorous, terrestrial vermivorous, and semi-fossorial vermivorous dietary categories. AICc = Akaike's information criterion corrected.  $\Delta$ AICc = difference between AICc compared to minimum AICc.

| Model      | SNW/SNL |               |
|------------|---------|---------------|
|            | AICc    | $\Delta$ AICc |
| <b>BM</b>  | -90.22  | 27.60         |
| <b>OU1</b> | -104.65 | 13.17         |
| <b>OU2</b> | -104.60 | 13.21         |
| <b>OU3</b> | -117.82 | 00.00         |

**Table S8.** Dataset used for quantitative analyses. Abbreviations: see Table S1. American Museum of Natural History (AMNH), Centre de Biologie et de Gestion des Populations (CBGP), Field Museum of Natural History (FMNH), Museums Victoria (NMV), Museum Zoologicum Bogoriense (MZB), Natural History Museum London (NHMUK previously BMNH), Natural History Museum of Paris (MNHN), Smithsonian Institution National Museum of Natural History (NMNH), and University of Montpellier (UM).

| Taxa                   | MUSEUM | VOUCHER    | Time    | DIET  | Sex | mISA   | iISA   | sISA  | rISA   | eISA   | fISA  | eISA   | hISA   | totISA | SNL   | SNL   | SNW  | 2DRepl | 2DOils  | 2DCarRepl | 2DCarOils | ChkRepl | ChkOils | ChkSRepl | ChkSOils |
|------------------------|--------|------------|---------|-------|-----|--------|--------|-------|--------|--------|-------|--------|--------|--------|-------|-------|------|--------|---------|-----------|-----------|---------|---------|----------|----------|
| Apomys_jabrae          | AMNH   | D4099.00   | AP0bra  | OMNI  | -   | 45.86  | 112.45 | 25.73 | 54.49  | 73.22  | 36.87 | 50.99  | 54.84  | 454.45 | 37.00 | 6.09  | 1.47 | 1.52   | 2498.64 | 3681.00   | 147.20    | 2.14    | 1.54    | 1.72     |          |
| Apomys_banahao         | CBGP   | P0045      | AP0bna  | OMNI  | -   | 71.18  | 93.17  | 22.40 | 55.86  | 84.52  | 40.42 | 50.63  | 62.37  | 480.56 | 36.51 | 13.08 | 6.50 | 1.53   | 2768.21 | 4242.00   | 1.48      | 2.09    | 1.59    | 1.76     |          |
| Apomys_banahao         | CBGP   | P0067      | AP0bna  | OMNI  | -   | 51.74  | 82.52  | 21.15 | 41.47  | 66.34  | 32.26 | 35.17  | 43.19  | 373.83 | 33.74 | 12.16 | 5.65 | -      | -       | -         | 1.48      | 2.03    | 1.55    | 1.63     |          |
| Apomys_banahao         | CBGP   | P0066      | AP0bna  | OMNI  | -   | 95.83  | 141.24 | 27.78 | 60.51  | 89.26  | 39.57 | 43.07  | 71.20  | 568.47 | 38.38 | 13.30 | 6.81 | -      | -       | -         | 1.67      | 2.17    | 1.66    | 1.70     |          |
| Apomys_date            | FMNH   | 232475.00  | AP0dta  | OMNI  | F   | 57.64  | 143.09 | 42.91 | 80.95  | 126.60 | 60.02 | 69.49  | 88.23  | 669.03 | 38.48 | 14.26 | 7.62 | 1.56   | 3277.09 | 5127.00   | 1.62      | 2.74    | 1.65    | 1.89     |          |
| Apomys_date            | FMNH   | 130256.00  | AP0dta  | OMNI  | M   | 73.04  | 110.79 | 31.89 | 82.47  | 117.05 | 55.07 | 59.41  | 80.02  | 608.73 | 31.73 | 13.65 | 6.54 | -      | -       | -         | 1.32      | 2.48    | 1.49    | 1.83     |          |
| Apomys_hylocoetes      | USNM   | 102544.00  | AP0hly  | OMNI  | F   | 39.44  | 93.68  | 13.59 | 32.53  | 54.47  | 18.86 | 28.01  | 36.11  | 316.78 | 30.51 | 11.02 | 5.40 | 1.48   | 1.46    | 2300.00   | 3709.00   | 1.95    | 2.22    | 1.84     | 1.71     |
| Apomys_lyllozalis      | USNM   | 487855.00  | AP0lly  | OMNI  | M   | 35.44  | 60.65  | 13.42 | 32.47  | 58.77  | 20.12 | 29.07  | 35.99  | 285.94 | 29.14 | 9.34  | 5.21 | 1.46   | 1.42    | 2393.68   | 3197.00   | 1.47    | 2.10    | 1.58     | 1.69     |
| Archibdomys_lucenensis | USNM   | 578840.00  | AR0luc  | INSEC | F   | 33.27  | 48.03  | 15.44 | 38.81  | 52.07  | 19.01 | 26.29  | 33.29  | 266.21 | 26.67 | 9.10  | 5.13 | 1.46   | 1.53    | 2695.39   | 3935.00   | 1.51    | 2.45    | 1.58     | 1.79     |
| Archibdomys_lucenensis | USNM   | 578837.00  | AR0luc  | INSEC | M   | 32.78  | 52.09  | 12.07 | 38.71  | 54.39  | 19.37 | 27.30  | 37.88  | 274.58 | 28.10 | 9.30  | 4.93 | -      | -       | -         | 1.42      | 2.42    | 1.56    | 1.79     |          |
| Buromys_andrewsi       | NMNH   | 31692.00   | BU0andr | OMNI  | -   | 62.54  | 132.80 | 21.63 | 59.70  | 80.96  | 45.31 | 50.49  | 66.65  | 520.08 | 36.08 | 15.05 | 6.63 | 1.43   | 1.46    | 2083.80   | 2979.00   | 1.68    | 2.32    | 1.72     | 1.77     |
| Buromys_andrewsi       | NMNH   | 31692.00   | BU0andr | OMNI  | -   | 88.70  | 150.71 | 34.02 | 64.89  | 100.92 | 43.97 | 53.23  | 61.35  | 597.48 | 40.75 | 16.13 | 7.94 | -      | -       | -         | 1.70      | 2.18    | 1.74    | 1.72     |          |
| Buromys_perotus        | NMNH   | 36868.00   | BU0peri | OMNI  | -   | 77.80  | 179.94 | 42.15 | 137.21 | 86.21  | 51.81 | 109.92 | 85.00  | 45.23  | 18.67 | 8.31  | 5.53 | 1.58   | 1.58    | 2296.93   | 3512.00   | 1.55    | 2.64    | 1.67     | 1.86     |
| Chromomys_gonzalesi    | USNM   | 488955.00  | CHR0gz  | WORM  | F   | 50.11  | 53.48  | 24.36 | 80.38  | 78.84  | 37.79 | 51.63  | 60.37  | 436.95 | 34.45 | 12.00 | 7.49 | 1.36   | 1.52    | 2238.40   | 3044.00   | 1.16    | 2.43    | 1.43     | 1.80     |
| Chromomys_mindorensis  | FMNH   | 22107.00   | CHR0md  | WORM  | F   | 43.34  | 85.29  | 38.74 | 94.64  | 91.61  | 49.60 | 70.22  | 86.33  | 559.77 | 37.54 | 12.52 | 8.19 | 1.36   | 1.55    | 2010.33   | 2725.00   | 1.32    | 2.74    | 1.50     | 1.88     |
| Chromomys_silvaceus    | NMNHUK | 97.5.2.16  | CHR0sl  | WORM  | M   | 47.19  | 61.08  | 24.81 | 68.76  | 75.80  | 38.55 | 51.14  | 49.98  | 417.10 | 34.62 | 11.06 | 6.91 | 1.48   | 1.53    | 2644.03   | 3954.00   | 1.50    | 2.33    | 1.58     | 1.77     |
| Chromomys_silvaceus    | NMNHUK | 97.5.2.39  | CHR0sl  | WORM  | F   | 41.72  | 59.29  | 18.89 | 56.20  | 61.89  | 37.46 | 51.64  | 56.79  | 385.87 | 33.31 | 11.21 | 6.02 | -      | -       | -         | 1.53      | 2.40    | 1.63    | 1.71     |          |
| Chromomys_whitladi     | NMNHUK | 95.8.2.29  | CHR0wh  | WORM  | F   | 49.03  | 70.45  | 28.03 | 82.65  | 105.97 | 51.56 | 62.95  | 90.61  | 547.26 | 35.29 | 12.30 | 7.88 | 1.42   | 1.60    | 2483.92   | 3825.00   | 1.57    | 2.88    | 1.62     | 1.95     |
| Chromomys_whitladi     | NMNHUK | 95.8.2.19  | CHR0wh  | WORM  | M   | 64.47  | 85.89  | 38.71 | 94.25  | 92.76  | 56.15 | 67.34  | 91.50  | 500.87 | 36.84 | 12.12 | 7.59 | -      | -       | -         | 1.44      | 2.53    | 1.55    | 1.85     |          |
| Chromomys_whitladi     | NMNHUK | 97.5.2.17  | CHR0wh  | WORM  | F   | 57.88  | 80.57  | 33.00 | 80.92  | 83.35  | 47.17 | 53.42  | 79.17  | 516.08 | 35.78 | 12.24 | 7.73 | -      | -       | -         | 1.38      | 2.48    | 1.56    | 1.82     |          |
| Crunomys_falax         | NMNHUK | 97.4.8.1   | CR0fal  | INSEC | -   | 15.78  | 22.72  | 9.17  | 16.24  | 24.17  | 9.69  | 12.78  | 16.09  | 126.63 | 25.89 | 8.82  | 4.06 | 1.28   | 1.43    | 1256.45   | 1606.00   | 0.94    | 1.85    | 1.35     | 1.56     |
| Crunomys_melanus       | NMNHUK | 7.2.2.14   | CR0mel  | INSEC | M   | 23.39  | 29.81  | 8.99  | 23.20  | 35.78  | 13.63 | 19.34  | 24.01  | 177.89 | 27.12 | 9.24  | 6.61 | 1.37   | 1.39    | 1841.28   | 2515.00   | 1.06    | 1.94    | 1.38     | 1.57     |
| Deomys_ferrugineus     | NMNHUK | 1400.00    | DE0ferr | INSEC | -   | 46.38  | 100.29 | 13.92 | 24.11  | 79.92  | 39.04 | 41.62  | 376.38 | 37.55  | 16.04 | 5.22  | 1.45 | 1.56   | 2271.12 | 3282.00   | 1.62      | 2.23    | 1.62    | 1.79     |          |
| Deomys_ferrugineus     | NMNHUK | 1402.00    | DE0ferr | INSEC | -   | 49.53  | 81.63  | 14.42 | 23.50  | 63.38  | 23.92 | 36.12  | 34.94  | 326.49 | 35.94 | 15.29 | 5.07 | -      | -       | -         | 1.60      | 2.15    | 1.60    | 1.83     |          |
| Echthoxy_centosa       | NMNHUK | 40.385     | ECH0ce  | WORM  | F   | 95.13  | 152.01 | 39.44 | 106.40 | 142.58 | 62.49 | 81.37  | 112.51 | 719.92 | 51.82 | 21.44 | 7.39 | 1.45   | 1.55    | 2250.53   | 3651.00   | 1.54    | 2.32    | 1.71     | 1.83     |
| Echthoxy_centosa       | NMNHUK | 153013.00  | ECH0ce  | WORM  | M   | 91.34  | 132.22 | 42.59 | 93.33  | 143.38 | 56.80 | 70.30  | 94.85  | 734.82 | 52.29 | 22.83 | 6.75 | -      | -       | -         | 1.40      | 2.41    | 1.63    | 1.83     |          |
| Echthoxy_lucura        | NMNHUK | 97.1.2.46  | ECH0luc | WORM  | M   | 96.81  | 159.22 | 46.65 | 101.20 | 152.26 | 55.06 | 82.46  | 90.03  | 783.89 | 53.68 | 22.50 | 6.95 | 1.43   | 1.56    | 2420.25   | 3452.00   | 1.39    | 2.36    | 1.68     | 1.82     |
| Echthoxy_lucura        | NMNHUK | 97.1.2.45  | ECH0luc | WORM  | M   | 93.01  | 128.75 | 41.30 | 107.86 | 126.19 | 68.36 | 86.23  | 119.37 | 770.86 | 53.13 | 22.54 | 7.12 | -      | -       | -         | 1.40      | 2.38    | 1.66    | 1.80     |          |
| Gracilomys_nalis       | NMNHUK | 31695.00   | GR0nal  | OMNI  | -   | 24.73  | 41.97  | 12.26 | 29.49  | 54.12  | 17.95 | 24.24  | 20.26  | 226.69 | 29.51 | 10.00 | 5.32 | 1.38   | 1.47    | 1070.77   | 2581.00   | 1.25    | 2.22    | 1.45     | 1.68     |
| Halmaheromys_bakimkot  | MZB    | 82366.00   | HAL0bak | OMNI  | -   | 116.12 | 178.68 | 50.38 | 103.91 | 149.48 | 68.25 | 85.72  | 82.26  | 834.99 | 51.12 | 19.26 | 8.43 | 1.49   | 1.53    | 2475.95   | 3681.00   | 1.72    | 2.45    | 1.71     | 1.83     |
| Hyrrhomyomys_stampelae | NMNHUK | 237.58     | HYR0st  | WORM  | -   | 45.62  | 73.22  | 24.02 | 82.33  | 98.39  | 58.87 | 73.39  | 91.13  | 546.94 | 46.99 | 18.35 | 7.35 | 1.29   | 1.49    | 1891.19   | 2450.00   | 1.21    | 2.57    | 1.45     | 1.80     |
| Leptomys_falensis      | NMNHUK | 295.27.22  | LEP0fal | INSEC | F   | 47.48  | 86.64  | 21.57 | 53.28  | 81.39  | 38.61 | 46.87  | 50.30  | 426.14 | 38.58 | 14.31 | 6.43 | 1.44   | 1.56    | 2234.15   | 3225.00   | 1.33    | 2.47    | 1.53     | 1.75     |
| Leptomys_falensis      | NMNHUK | 5.11.28.22 | LEP0fal | INSEC | M   | 51.69  | 91.06  | 26.38 | 49.84  | 71.44  | 35.71 | 41.03  | 54.68  | 421.91 | 36.79 | 13.93 | 6.32 | 1.50   | 1.52    | 2480.17   | 3221.00   | 1.55    | 2.19    | 1.62     | 1.74     |
| Leptomys_elegans       | NMNHUK | 50.1254    | LEP0leg | INSEC | M   | 51.95  | 75.32  | 27.63 | 47.17  | 66.37  | 34.88 | 41.22  | 55.87  | 400.20 | 36.01 | 12.74 | 6.17 | -      | -       | -         | 1.50      | 2.22    | 1.56    | 1.74     |          |
| Leptomys_eudimorphi    | NMNHUK | 50.1252    | LEP0leg | INSEC | M   | 60.87  | 93.98  | 26.98 | 56.28  | 76.80  | 42.07 | 44.16  | 49.29  | 448.22 | 36.67 | 13.70 | 6.80 | 1.48   | 1.54    | 2848.95   | 4728.00   | 1.64    | 2.46    | 1.60     | 1.79     |
| Leptomys_eudimorphi    | AMNH   | 194936.00  | LEP0leg | INSEC | F   | 46.79  | 71.26  | 24.83 | 41.69  | 59.80  | 29.08 | 35.74  | 44.07  | 353.33 | 35.55 | 11.91 | 6.22 | -      | -       | -         | 1.40      | 2.26    | 1.53    | 1.73     |          |
| Leptomys_signatus      | AMNH   | 105370.00  | LEP0sig | INSEC | F   | 44.43  | 64.80  | 17.93 | 32.67  | 56.63  | 26.42 | 30.50  | 38.62  | 312.00 | 33.40 | 12.02 | 5.62 | 1.46   | 1.47    | 2384.04   | 3490.00   | 1.42    | 2.06    | 1.54     | 1.66     |
| Malcomys_candollei     | USNM   | 486151.00  | MAL0can | OMNI  | M   | 57.40  | 91.74  | 29.17 | 78.86  | 84.95  | 42.11 | 61.43  | 74.79  | 521.46 | 38.98 | 15.14 | 6.70 | 1.41   | 1.58    | 2271.92   | 3210.00   | 1.36    | 2.60    | 1.62     | 1.88     |
| Malcomys_edwardsi      | AMNH   | 46726.00   | MAL0eda | OMNI  | F   | 37.05  | 80.22  | 15.26 | 50.81  | 61.99  | 21.35 | 31.80  | 44.34  | 343.43 | 33.69 | 13.41 | 5.18 | 1.45   | 1.54    | 2206.53   | 3205.00   | 1.28    | 2.27    | 1.53     | 1.78     |
| Maomys_muscibroekii    | CBGP   | 37009.00   | MA0mus  | OMNI  | -   | 89.41  | 121.07 | 26.45 | 77.42  | 102.55 | 41.92 | 62.22  | 96.41  | 617.44 | 42.53 | 16.11 | 6.17 | 1.48   | 1.55    | 2262.00   | 3355.00   | 1.46    | 2.40    | 1.56     | 1.82     |
| Maomys_sulzeri         | CBGP   | 6399.00    | MA0sul  | OMNI  | F   | 17.11  | 91.74  | 35.17 | 87.11  | 108.53 | 52.94 | 67.63  | 90.47  | 651.60 | 44.98 | 15.99 | 7.30 | 1.46   | 1.49    | 2481.32   | 3641.00   | 1.39    | 2.14    | 1.61     | 1.73     |
| Maomys_sulzeri         | CBGP   | 03135      | MA0sul  | OMNI  | F   | 115.27 | 139.17 | 39.25 | 108.19 | 137.39 | 53.23 | 51.92  | 96.44  | 757.47 | 44.29 | 17.64 | 7.30 | 1.33   | 1.47    | 1886.63   | 2646.00   | 1.17    | 2.52    | 1.50     | 1.86     |
| Mayeromys_ellermani    | AMNH   | 53278.00   | MA0yell | INSEC | M   | 11.77  | 18.40  | 6.14  | 14.23  | 19.11  | 8.45  | 11.68  | 10.37  | 100.15 | 21.40 | 6.84  | 4.54 | 1.33   | 1.47    | 1986.61   | 2400.00   | 1.39    | 2.20    | 1.48     | 1.59     |
| Mayeromys_ellermani    | NMNHUK | 53280.00   | MA0yell | INSEC | M   | 16.30  | 22.38  | 6.82  | 19.28  | 25.57  | 13.02 | 14.    |        |        |       |       |      |        |         |           |           |         |         |          |          |



**Table S9.** List of references for dietary categorizations.

| Species | DIET  | Region | Reference                                                                            |
|---------|-------|--------|--------------------------------------------------------------------------------------|
| APOabra | OMNI  | PHIL   | Heaney et. al. 2016                                                                  |
| APObana | OMNI  | PHIL   | Heaney et. al. 2016                                                                  |
| APOdata | OMNI  | PHIL   | Heaney et. al. 2016                                                                  |
| APOhylo | OMNI  | PHIL   | L. Heaney pers. comm.; IUCN red list                                                 |
| APOlitt | OMNI  | PHIL   | Based on other Apomys                                                                |
| ARCluzo | CARNI | PHIL   | Rickart et. al. 1991; Heaney et. al. 1999; Balete et. al. 2012                       |
| BUNandr | OMNI  | SULAW  | Musser 2014                                                                          |
| BUNpeni | OMNI  | SULAW  | Musser 2014                                                                          |
| CHRgonz | VERMI | PHIL   | Rickart et. al. 1991; Heaney et. al. 1999                                            |
| CHRmind | VERMI | PHIL   | Rickart et. al. 1991; Heaney et. al. 1999; Heaney et. al. 2016                       |
| CHRsila | VERMI | PHIL   | Heaney et. al. 2010; Rickart et. al. 2011                                            |
| CHRwhit | VERMI | PHIL   | Heaney et. al. 2010; Rickart et. al. 2011                                            |
| CRUfall | CARNI | PHIL   | -                                                                                    |
| DEOferr | CARNI | AFRIC  | Happold 2013                                                                         |
| CRUmela | CARNI | PHIL   | Musser & Durden 2002                                                                 |
| ECHcent | VERMI | SULAW  | Musser & Durden 2014                                                                 |
| ECHleuc | VERMI | SULAW  | Musser 1990                                                                          |
| GRAradi | OMNI  | SULAW  | Rowe et. al. 2016                                                                    |
| HALboki | OMNI  | MOLUC  | Fabre et. al. 2013                                                                   |
| HYOstue | VERMI | SULAW  | Esselstyn et. al. 2015                                                               |
| LEParf  | CARNI | PAPUA  | Musser et. al. 2008                                                                  |
| LEPeleg | CARNI | PAPUA  | Musser et. al. 2008                                                                  |
| LEPerns | CARNI | PAPUA  | Musser et. al. 2008                                                                  |
| LEPsign | CARNI | PAPUA  | Musser et. al. 2008                                                                  |
| MALedwa | OMNI  | AFRIC  | Happold 1987; Cole 1975                                                              |
| MAXmuss | OMNI  | SULAW  | Musser 1982                                                                          |
| MAXsuri | OMNI  | ORIEN  | Pimsai et. al. 2014                                                                  |
| MELburt | OMNI  | MOLUC  | Kerle 2008                                                                           |
| MELobie | OMNI  | MOLUC  | Pers. Data.                                                                          |
| MELnaso | VERMI | SULAW  | Musser 1982                                                                          |
| MICrich | CARNI | PAPUA  | Helgen et. al. 2010                                                                  |
| MUScerv | OMNI  | ORIEN  | Francis 2008; Lekagul & McNeely 1988                                                 |
| MUSpaha | CARNI | ORIEN  | Smith & Xie 2008                                                                     |
| NANminu | OMNI  | AFRIC  | Happold 2013                                                                         |
| OXYdasy | CARNI | AMERI  | Based on other Oxymycterus species; Wilson et. al. 2017                              |
| OXYquae | CARNI | AMERI  | Based on other Oxymycterus species; Wilson et. al. 2017                              |
| PARwilh | CARNI | PAPUA  | Musser et. al. 2008                                                                  |
| PAUverm | VERMI | SULAW  | Esselstyn et. al. 2012                                                               |
| PSEelea | CARNI | PAPUA  | Based on other Pseudohydromys                                                        |
| PSEelle | CARNI | PAPUA  | Based on other Pseudohydromys                                                        |
| PSEfusc | CARNI | PAPUA  | Wilson et. al. 2017                                                                  |
| PSEmuri | CARNI | PAPUA  | Wilson et. al. 2017                                                                  |
| RATmarm | OMNI  | SULAW  | Musser 1982                                                                          |
| RATmoro | OMNI  | MOLUC  | Pers. Comm.                                                                          |
| RATnorv | OMNI  | ORIEN  | Francis 2008; Zhang et. al. 2005                                                     |
| RATprae | OMNI  | PAPUA  | Taylor et. al. 1982; Flannery 1995                                                   |
| RATtane | OMNI  | ORIEN  | Pimsai et. al. 2014                                                                  |
| RHYisar | VERMI | PHIL   | Rickart et. Al. 1991; Heaney et. al. 1999; Rickart et. al. 2011; Balete et. al. 2009 |
| RHYsori | VERMI | PHIL   | Rickart et. Al. 1991; Heaney et. al. 1999; Rickart et. al. 2011; Balete et. al. 2009 |
| SIGhisp | OMNI  | AMERI  | Cameron & Spencer 1981                                                               |
| SOMmacr | CARNI | SULAW  | Musser & Durden 2002; Achmadi et. al. 2014                                           |
| SORleon | VERMI | PHIL   | Balete et. al. 2012                                                                  |
| TATmacr | VERMI | SULAW  | Musser 1982                                                                          |
| TATrhin | VERMI | SULAW  | Musser 1982                                                                          |
